# Supplementary material for: Twisting, bending, stretching: strategies for making ferromagnetic [MnIII3] triangles
Source: Royal Society of Chemistry journal article supplement (doi:10.1039/b911820a), 2009-01-01
Supplement: b911820a.pdf [file b911820a.pdf]

**Figure SI2.** The hydrogen bonded layer (left) and the chain (right) in **15**. Colour code: Mn, purple; O, red; N, blue; C, gold; H, cyan. Most hydrogen and carbon atoms have been omitted for clarity. Symmetry codes: a x-1, y, z; b -x, 1-y, 2-z; c 1-x, 1-y, 2-z.

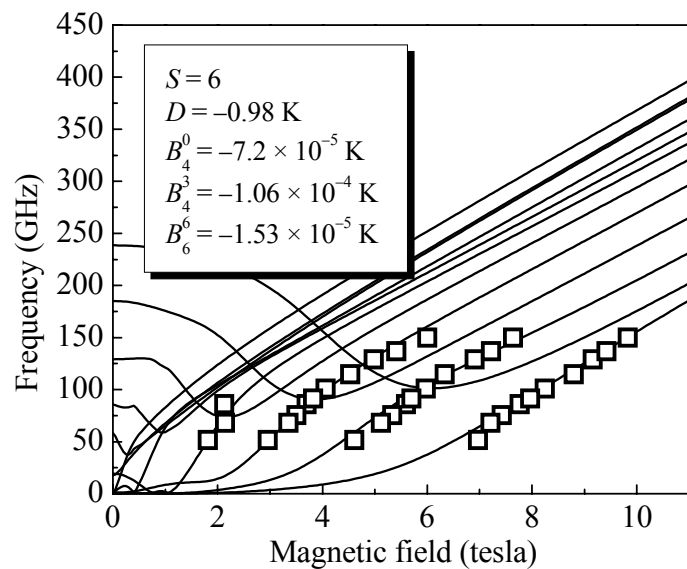

**Fig. SI3.** Energy difference diagram constructed from frequency-dependent measurements for the hard plane orientation for complex **13** at a temperature of 5 K. The solid lines are simulations using the parameters shown in the figure.
